RESEARCH ARTICLE

# Cognitive Dysfunction and Malnutrition Are Independent Predictor of Dysphagia in Patients with Acute Exacerbation of Congestive Heart Failure

Junichi Yokota<sup>1,2</sup>✉, Yoshiko Ogawa<sup>3</sup>✉, Shinsuke Yamanaka<sup>4</sup>, Yoshimi Takahashi<sup>4</sup>, Hiroshi Fujita<sup>4</sup>, Nobuhiro Yamaguchi<sup>4</sup>, Noriko Onoue<sup>4</sup>, Takeshi Ishizuka<sup>4</sup>, Tsuyoshi Shinozaki<sup>4</sup>, Masahiro Kohzuki<sup>1</sup>\*

**1** Department of Internal Medicine and Rehabilitation Science, Tohoku University Graduate School of Medicine, Sendai, Japan, **2** Department of Rehabilitation, Sendai Medical Center, Sendai, Japan, **3** Department of Sport and Medical Sciences, Faculty of Medical Technology, Teikyo University, Tokyo, Japan, **4** Department of Cardiology, Sendai Medical Center, Sendai, Japan

✉ These authors contributed equally to this work.

\* [kohzuki@med.tohoku.ac.jp](mailto:kohzuki@med.tohoku.ac.jp)

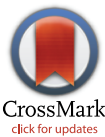

**OPEN ACCESS**

**Citation:** Yokota J, Ogawa Y, Yamanaka S, Takahashi Y, Fujita H, Yamaguchi N, et al. (2016) Cognitive Dysfunction and Malnutrition Are Independent Predictor of Dysphagia in Patients with Acute Exacerbation of Congestive Heart Failure. PLoS ONE 11(11): e0167326. doi:10.1371/journal.pone.0167326

**Editor:** Stephen E Alway, West Virginia University School of Medicine, UNITED STATES

**Received:** May 19, 2016

**Accepted:** November 13, 2016

**Published:** November 29, 2016

**Copyright:** © 2016 Yokota et al. This is an open access article distributed under the terms of the [Creative Commons Attribution License](https://creativecommons.org/licenses/by/4.0/), which permits unrestricted use, distribution, and reproduction in any medium, provided the original author and source are credited.

**Data Availability Statement:** All relevant data are within the paper.

**Funding:** The authors received no specific funding for this work.

**Competing Interests:** The authors have declared that no competing interests exist.

## Abstract

Early detection and intervention for dysphagia is important in patients with congestive heart failure (CHF). However, previous studies have focused on how many patients with dysphagia develop CHF. Studies focusing on the comorbidity of dysphagia in patients with CHF are rare. Additionally, risk factors for dysphagia in patients with CHF are unclear. Thus, the aim of this study was to clarify risk factors for dysphagia in patients with acute exacerbation of CHF. A total of 105 patients, who were admitted with acute exacerbation of CHF, were enrolled. Clinical interviews, blood chemistry analysis, electrocardiography, echocardiography, Mini-Mental State Examination (MMSE), exercise tolerance tests, phonatory function tests, and evaluation of activities of daily living (ADL) and nutrition were conducted on admission. After attending physicians permitted the drinking of water, swallowing screening tests were performed. Patients were divided into a dysphagia group (DG) or a non-dysphagia group (non-DG) based on Functional Oral Intake Scale level. Among the 105 patients, 38 had dysphagia. A greater number of patients had history of aspiration pneumonia and dementia, and there was a higher age, N-terminal pro-B-type natriuretic peptide level in the DG compared with the non-DG. MMSE scores, exercise tolerance, phonatory function, status of ADL, nutrition, albumin, and transthyretin were lower in the DG compared with the non-DG. In multivariate analysis, after adjusting for age and sex, MMSE, BI score, and transthyretin was independently associated with dysphagia. Comorbidity of dysphagia was 36.1% in patients with acute exacerbation of CHF, and cognitive dysfunction and malnutrition may be an independent predictor of dysphagia.

## Introduction

Heart failure is a global public health problem. In the United States alone, the prevalence is 5.7 million, with 870,000 new cases diagnosed each year [1]. Similarly, in Japan, the increasing number of patients with heart failure is concerning. Indeed, the number of Japanese outpatients with left ventricular dysfunction was 979,000 in 2005 [2]. It is projected that the incidence of left ventricular dysfunction will first rapidly and then gradually increase to a peak of 1.32 million patients by 2035, with a rapid acceleration occurring by 2020 [2]. Accordingly, congestive heart failure (CHF) patients having various comorbidity and medical history has been increasing. In particular, a various comorbidity occurs in patients with acute exacerbation of CHF various comorbidity and one is a dysphagia.

Little is known about relationship between CHF and dysphagia, however, some investigation results has been reported. Respiratory diseases, chronic obstructive pulmonary disease, and xerostomia, were indicated as risk factors for oropharyngeal dysphagia [3]. Another retrospective study reported a high incidence of risk for oropharyngeal dysphagia in hospitalized patients, and hospitalized patients with CHF. Moreover, dysphagia increases length of hospital stay 1.8 times in patients with CHF [4]. Moreover, Zhu, et al. have shown that high blood pressure and heart failure are important risk factors for hospital-acquired pneumonia in cardiovascular inpatients, and that contracting hospital-acquired pneumonia significantly increases morbidity, mortality, hospitalization stays, and total medical costs [5]. It is suspected that CHF is strongly related to dysphagia.

Dysphagia is a risk factor for malnutrition and incidence of lower respiratory tract infection in the independently-living elderly population [6]. In addition, a recent investigation demonstrated that dysphagia was related to sarcopenia or the causes of sarcopenia in hospitalized elderly patients without a history of treatment for stroke, and without diagnosis of neurodegenerative disease [7]. CHF patients with cardiac cachexia, caused by malnutrition, have mortality 2–3 times higher compared with non-cachectic CHF patients [8]. Therefore, dysphagia may affect prognosis in patients with CHF through malnutrition, sarcopenia, and cardiac cachexia, as well as aspiration pneumonia.

However, previous studies have focused on how many patients with dysphagia develop CHF. Prospective studies focusing on the comorbidity of dysphagia in patients with CHF are rare. Therefore, ratio of comorbidity of dysphagia and risk factors for dysphagia in patients with CHF are unclear. Since aspiration pneumonia and malnutrition may affect clinical condition and prognosis, early detection and intervention for dysphagia is important in patients with acute exacerbation of CHF. Thus, the aim of the present study was to clarify the comorbidity of dysphagia and risk factors in patients with acute exacerbation of CHF.

## Materials and Methods

### Subjects and Study Design

In this study, 150 consecutive patients, who were admitted to the Department of Cardiology, National Hospital Organization Sendai Medical Center, with acute exacerbation of CHF from May 2015 to May 2016, were admitted. Patients, who were under 20 years of age and were judged inappropriate for the present study, were excluded. Of the 150 patients admitted, 12 were judged inappropriate because of severe mental disease in five patients, agitation in four patients, and severe depression in the remaining patient. A total of 33 patients did not give consent to participate and were therefore excluded. Therefore, a total of 105 patients were registered.

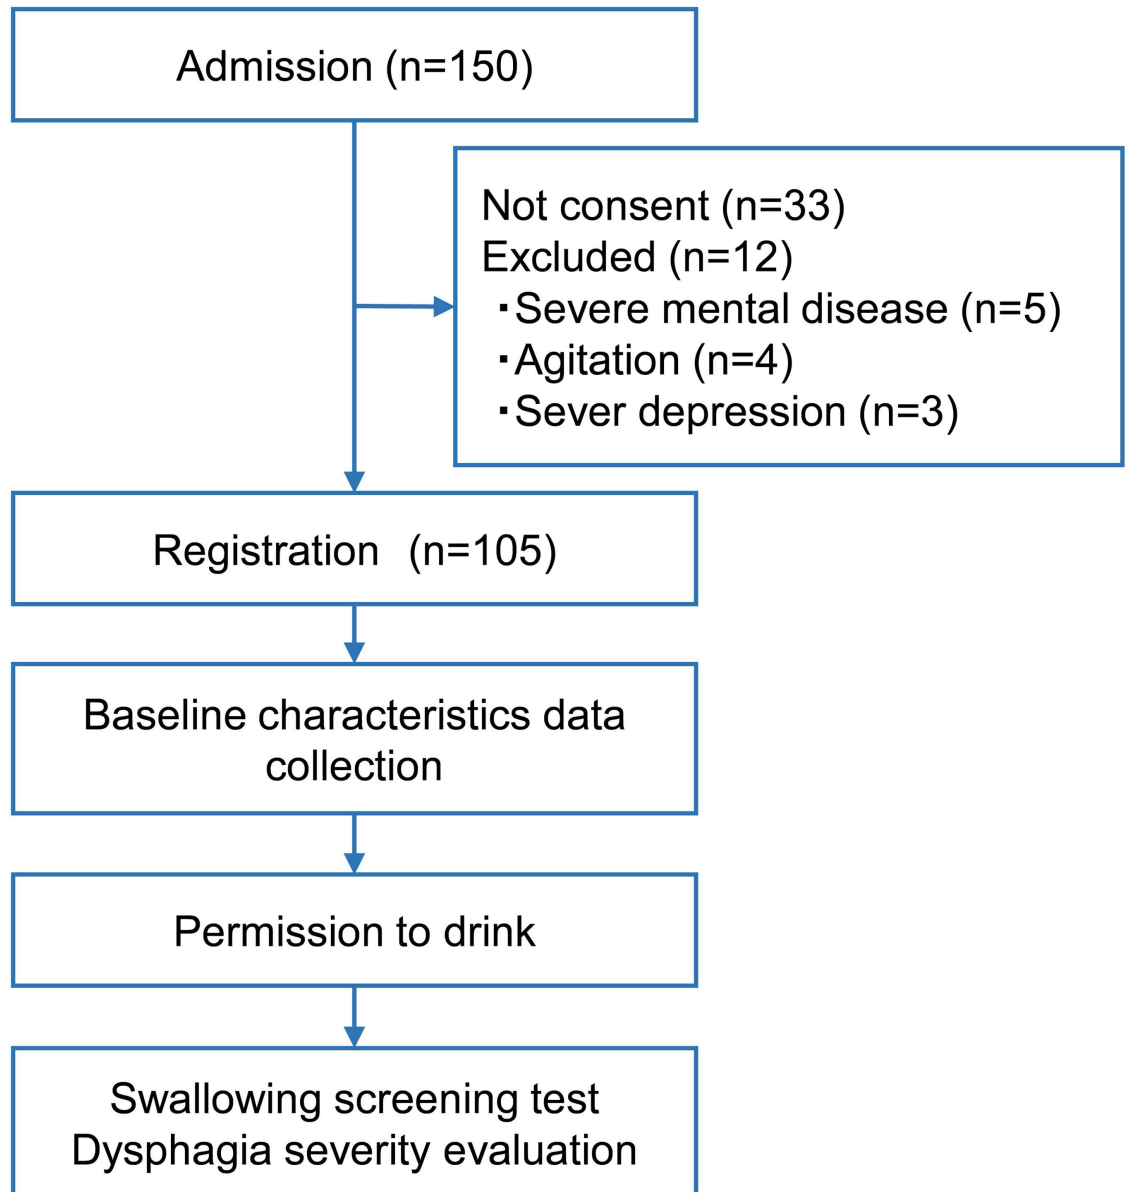

**Fig 1. Study design.** Baseline characteristics of the patients was collected after registration. Swallowing screening tests were performed after attending physicians permitted the drinking of water and dysphagia severity were evaluated.

doi:10.1371/journal.pone.0167326.g001

This study used a cross-sectional design, as shown in [Fig 1](#). Information concerning baseline characteristics of the patients was collected after registration. Swallowing screening tests were performed after attending physicians permitted the drinking of water.

This study was approved by the Ethics Committee of Tohoku University Graduate School of Medicine (Approval No. 2015-1-060), and the Ethics Committee of Sendai Medical Center (Approval No. 27-1). All participating patients provided written informed consent.

### Baseline Characteristics and Data Collection

Clinical information on admission, including age, sex, height, weight, body mass index (BMI), medical history, complications of diabetes, hypertension, and dyslipidemia, medications using

**Table 1. Functional Oral Intake Scale [9].**

|         |                                                                                                              |
|---------|--------------------------------------------------------------------------------------------------------------|
| Level 1 | Nothing by mouth.                                                                                            |
| Level 2 | Tube dependent with minimal attempts of food or liquid.                                                      |
| Level 3 | Tube dependent with consistent oral intake of food or liquid.                                                |
| Level 4 | Total oral diet of a single consistency.                                                                     |
| Level 5 | Total oral diet with multiple consistencies, but requiring special preparation or compensations.             |
| Level 6 | Total oral diet with multiple consistencies without special preparation, but with specific food limitations. |
| Level 7 | Total oral diet with no restrictions.                                                                        |

doi:10.1371/journal.pone.0167326.t001

angiotensin converting enzyme inhibitor, angiotensin receptor blocker, statin, calcium antagonists, diuretics, beta-blocker, and digitalis, smoking history, and alcohol history, was obtained from interviews with the patients or family members. Prehospital Functional Oral Intake Scale (FOIS) [9] score was also obtained. The FOIS is a 7-point scale and measures the level of independence of functional oral intake (Table 1). Levels 1–3 relate to varying degrees of non-oral feeding, and levels 4–7 relate to varying degrees of oral feeding without non-oral supplementation. These latter scale levels consider both diet modifications and patient compensations [9]. Clinically significant dysphagia was defined as requirement for modification of an oral diet (FOIS grades 1–5) [7, 10]. According to previous studies, dysphagia was defined as having a FOIS level of 5 or less in the present study [7, 10].

Diagnosis of New York Heart Association (NYHA) functional class was determined by cardiologists. Blood chemistry analysis, electrocardiography, and echocardiography were performed.

Cognitive function was evaluated using the Mini-Mental State Examination (MMSE) [11]. Exercise tolerance was assessed using handgrip strength [12] and the Modified Specific Activity Scale (MSAS) [13], which is a modification of the Specific Activity Scale [14], to improve sensitivity and specificity. Phonatory function was evaluated using Maximum Phonation Time (MPT) data [15]. Activities of daily living (ADL) were evaluated using the Barthel Index (BI) [16]. Prehospital BI and prehospital MSAS scores were also evaluated. Arm circumference (AC), triceps skin fold (TSF), arm muscle circumference (AMC), arm muscle area (AMA) [17], and controlling nutritional status (CONUT) [18] were evaluated as a measurement of nutritional status. Anthropometric data were standardized according to age- and gender-stratified Japanese anthropometric reference data and expressed as percent arm circumference (%AC), percent TSF (%TSF), percent AMC (%AMC), and percent AMA (%AMA) [19]. CONUT, a nutritional assessment tool that assesses protein metabolism, lipid metabolism, and immune function using three parameters (serum albumin, total cholesterol, and total lymphocyte count), was calculated [18].

## Swallowing Screening Test

The Repetitive Saliva Swallowing Test (RSST) [20, 21] and the Water Swallowing Test (WST) [22] were performed.

RSST, in which swallowing movements can be identified by inspection and palpation of the prominentia laryngea, enables assessment of the potential to swallow saliva; it is performed by counting the frequency of swallows over 30 seconds. When the number of dry swallows was less than three times during 30 seconds, swallowing function of the patient was estimated as abnormal.

The WST was performed in the following procedures. Cold water (3 ml) was placed on the floor of the mouth. The patient was then instructed to swallow. If the patient was unable

to swallow, or experienced dyspnea, coughing, or wet-hoarse dysphonia after swallowing, the test was finished and a score was judged (1 for inability to swallow, 2 for dyspnea, and 3 for cough or dysphonia). Otherwise, the patient was asked to perform two dry swallows. If the patient was unable to perform either of the two dry swallows, a score of 4 was judged. If the patient was both dry swallows, a score of 5 was judged. The entire procedure was repeated twice more. Swallowing function of the patient was estimated as abnormal when the score was less than 4.

## Data and Statistical Analysis

Patients were divided into two groups: dysphagia group (DG) and non-dysphagia group (non-DG). All data are expressed as mean  $\pm$  standard deviation (SD) for continuous variables, and counts and percentages for categorical variables. Comparisons between groups were made using unpaired two tailed t tests for continuous variables and Chi-square tests for categorical variables. Predictors of dysphagia were assessed using logistic regression analysis. A univariate analysis was performed, and significant variables thought to be involved in comorbidity of dysphagia were entered into a multivariate model. In the logistic regression analysis, multicollinearity was assessed using the variance inflation factor (VIF) [23]. VIF values exceeding 10 are regarded as indicating serious multicollinearity [23].

Predictors were expressed as odds ratios (OR) with 95% confidence intervals (CI). All analyses were performed using SPSS 21.0 for Windows (SPSS Inc. Chicago, IL). Statistical significance was accepted at  $P < 0.05$ .

## Results

### The Comorbidity of Dysphagia

Among the 105 patients, dysphagia was observed in 38 patients. The mean FOIS level in the DG was significantly lower compared with the non-DG ( $3.3 \pm 1.1$  vs.  $6.8 \pm 0.4$   $P < 0.001$ ). The DG also had significantly lower prehospital FOIS compared with the non-DG ( $6.2 \pm 0.9$  vs.  $6.8 \pm 0.4$   $P < 0.001$ ). The number of patients receiving parenteral nutrition and enteral nutrition was 23 (60.5%) in the DG.

### Baseline Characteristics

Demographic characteristics is shown in Table 2. Age was significantly higher in the DG compared with the non-DG. There were no significant difference in the sex, height, weight, and BMI between the groups. In the DG, the number of patients with history of smoking abuse was significantly lower compared with the non-DG. The number of patients who had a history of aspiration pneumonia and dementia was significantly higher in the DG compared with the non-DG. Furthermore, there were more denture-wearers in the DG compared with the non-DG.

Table 3 shows the results of NYHA functional class, echocardiography, electrocardiography, and blood chemistry analyses. NYHA functional class was significantly higher in the DG compared with the non-DG. Furthermore, the DG had significantly higher N-terminal pro-B-type natriuretic peptide (NT-proBNP), blood urea nitrogen (BUN), and C-reactive protein (CRP) levels compared with the non-DG, and significantly lower hemoglobin, hematocrit, total lymphocyte count (TLC), albumin, and transthyretin compared with the non-DG. However, there was no significant difference in ejection fraction between the groups. In this study, the patients diagnosed heart failure with preserved ejection fraction ( $EF \geq 50\%$ ) were

**Table 2. Demographic characteristics.**

|                          | DG(n = 38) | non-DG(n = 67) | P-value |
|--------------------------|------------|----------------|---------|
| Age (years)              | 82.7±8.8   | 75.9±10.8      | 0.001   |
| Sex (male/female)        | 18/20      | 37/30          | 0.439   |
| Height (cm)              | 154.0±10.5 | 157.1±9.7      | 0.130   |
| Weight (kg)              | 53.8±13.7  | 57.9±13.3      | 0.141   |
| BMI (kg/m <sup>2</sup> ) | 22.5±4.5   | 23.4±4.4       | 0.361   |
| Medical history          |            |                |         |
| Angina pectoris          | 14 (36.8)  | 33 (49.3)      | 0.219   |
| Myocardial infarction    | 10 (26.3)  | 17 (25.4)      | 0.915   |
| Valvular disease         | 13 (34.2)  | 20 (29.9)      | 0.644   |
| Cerebrovascular disease  | 11 (28.9)  | 21 (31.3)      | 0.798   |
| Neuromuscular disease    | 2 (5.3)    | 1 (1.5)        | 0.296   |
| Respiratory disease      | 4 (10.5)   | 10 (14.9)      | 0.524   |
| Aspiration pneumonia     | 11 (28.9)  | 2 (3.0)        | <0.001  |
| Cancer                   | 12 (31.6)  | 12 (17.9)      | 0.109   |
| Dementia                 | 9 (23.7)   | 2 (3.0)        | 0.002   |
| Mental illness           | 4 (10.5)   | 7 (10.4)       | 0.616   |
| Complication             |            |                |         |
| Diabetes                 | 14 (36.8)  | 29 (43.3)      | 0.519   |
| Hypertension             | 29 (76.3)  | 46 (68.7)      | 0.404   |
| Dyslipidemia             | 11 (28.9)  | 26 (38.8)      | 0.310   |
| Medication               |            |                |         |
| ACEI                     | 7 (18.4)   | 24 (35.8)      | 0.060   |
| ARB                      | 12 (31.6)  | 26 (38.8)      | 0.459   |
| Statin                   | 9 (23.7)   | 16 (23.9)      | 0.982   |
| Calcium antagonists      | 15 (39.5)  | 25 (37.3)      | 0.827   |
| Diuretics                | 33 (86.8)  | 61 (91.0)      | 0.358   |
| Beta-blockers            | 7 (18.4)   | 24 (35.8)      | 0.060   |
| Digitalis                | 3 (7.9)    | 10 (14.9)      | 0.233   |
| Smoking                  | 11 (28.9)  | 37 (55.2)      | 0.009   |
| Alcohol                  | 14 (36.8)  | 35 (52.2)      | 0.129   |
| Use of dentures          | 31 (81.6)  | 40 (59.7)      | 0.021   |

Values are means ± standard deviation or numbers of subjects per group (n) with percentages.

DG, Dysphagia Group; non-DG, non-Dysphagia Group; BMI, body Mass Index; ACEI, Angiotensin Converting Enzyme Inhibitor; ARB, Angiotensin Receptor Blocker.

doi:10.1371/journal.pone.0167326.t002

about 50% (21 patients in dysphagia group (55.3%) and 32 patients in non-dysphagia group (47.8%))

Results of the cognitive function test, exercise tolerance tests, phonatory function test, and evaluation of status of ADL and nutrition are shown in Table 4. There was no significant difference in the mean number of days for evaluation between the groups. MMSE scores were significantly lower in the DG compared with the non-DG. The DG had significantly lower handgrip strength, MSAS, and BI compared with the non-DG. The DG also had significantly lower prehospital MSAS and prehospital BI compared with the non-DG. The DG had significantly lower MPT compared with the non-DG. However, there were no significance difference in the nutritional status between two groups.

**Table 3. Clinical and laboratory findings.**

|                                   | DG(n = 38)        | non-DG(n = 67)  | P-value |
|-----------------------------------|-------------------|-----------------|---------|
| NYHA class (I/II/III/IV)          | 0 / 10 / 18 / 10  | 6 / 19 / 37 / 5 | 0.012   |
| Echocardiography                  |                   |                 |         |
| Ejection fraction (%)             | 51.3±17.6         | 47.3±17.8       | 0.275   |
| LVDd/BSA (mm/m <sup>2</sup> )     | 34.9±4.8          | 34.0±6.0        | 0.420   |
| LVDs/BSA (mm/m <sup>2</sup> )     | 25.7±6.5          | 25.8±7.0        | 0.942   |
| Electrocardiography               |                   |                 |         |
| Atrial fibrillation               | 22 (57.9)         | 36 (53.7)       | 0.680   |
| Blood chemistry analysis          |                   |                 |         |
| NT-proBNP (pg/mL)                 | 16,049.6±16,734.0 | 7,156.4±9,751.0 | 0.004   |
| Hemoglobin (g/dL)                 | 10.2±2.0          | 11.9±2.4        | <0.016  |
| Hematocrit (%)                    | 31.3±5.8          | 36.1±6.8        | <0.013  |
| TLC (/μL)                         | 1,131.1±667.1     | 1,404.1±668.5   | 0.015   |
| BUN (g/dL)                        | 33.0±18.7         | 25.2±13.5       | 0.016   |
| Creatinine (g/dL)                 | 1.4±1.0           | 1.2±0.8         | 0.119   |
| Urinary acid (mg/dL)              | 7.0±2.3           | 6.9±2.3         | 0.778   |
| eGFR (mL/min/1.73m <sup>2</sup> ) | 47.1±29.0         | 57.0±27.5       | 0.087   |
| CRP (mg/dL)                       | 3.7±5.2           | 1.6±3.5         | 0.015   |
| Total Protein (g/dL)              | 6.4±0.7           | 6.5±0.6         | 0.283   |
| Albumin (g/dL)                    | 3.4±0.5           | 3.6±0.5         | 0.032   |
| Transthyretin (mg/dL)             | 15.1±4.3          | 17.6±5.0        | 0.012   |
| RBP (mg/dL)                       | 2.6±1.0           | 2.8±1.3         | 0.590   |
| Transferrin (mg/dL)               | 216.8±63.2        | 230.9±56.2      | 0.240   |
| Total cholesterol (g/dL)          | 169.1±46.2        | 160.0±34.8      | 0.262   |
| HDL cholesterol (g/dL)            | 49.8±13.2         | 48.9±13.4       | 0.738   |
| LDL cholesterol (g/dL)            | 97.4±44.3         | 91.6±28.7       | 0.419   |
| Triglyceride (g/dL)               | 78.9±33.9         | 83.0±33.8       | 0.557   |
| HbA1c (%)                         | 6.1±0.8           | 6.4±1.2         | 0.191   |

Values are means ± standard deviation or numbers of subjects per group (n) with percentages.

DG, Dysphagia Group; non-DG, non-Dysphagia Group; NYHA, New York Heart Association; BSA, Body Surface Area; LVDd, Left Ventricular end-diastolic Diameter; LVDs, Left Ventricular end-systolic Diameter; NT-proBNP, N-Terminal pro-B-type Natriuretic Peptide; TLC, Total Lymphocyte Count; BUN, Blood Urea Nitrogen; CRP, C-Reactive Protein; GFR, estimated Glomerular Filtration Rate; HDL, High Density lipoprotein; LDL, Low Density Lipoprotein; RBP, Retinol Binding Protein.

doi:10.1371/journal.pone.0167326.t003

## Swallowing Function

Table 5 presents the results of the swallowing screening tests. There were no significant difference in the mean number of days for evaluation and until patients were permitted the drinking after hospitalization between the groups. However, the mean number of days until patients was able to eat after hospitalization in the DG was significantly greater compared with the non-DG. The number of patients who were positive for the RSST was significantly higher in the DG compared with the non-DG. The DG had significantly lower WST scores compared with the non-DG. No patients were using sedative or hypnotic medication during evaluations.

## Predictors of Dysphagia

Results from logistic regression analysis of risk factors for dysphagia are shown in Table 6. Analysis was performed adjusting for age and sex. Variables whose VIF values exceeded 10

**Table 4. Cognitive function, physical performance and nutritional status.**

|                            | DG(n = 38) | non-DG(n = 67) | P-value |
|----------------------------|------------|----------------|---------|
| Performed evaluation (day) | 3.1±2.1    | 3.0±1.6        | 0.832   |
| MMSE (score)               | 18.3±5.4   | 24.2±5.3       | <0.001  |
| Handgrip strength (kg)     | 14.9±6.8   | 22.5±8.9       | <0.001  |
| Prehospital MSAS (METs)    | 2.8±1.1    | 3.9±1.6        | <0.001  |
| MSAS (METs)                | 1.8±0.4    | 2.5±1.4        | <0.001  |
| MPT (second)               | 8.1±3.7*   | 14.1±7.6       | <0.001  |
| Prehospital BI (score)     | 71.8±29.0  | 90.5±17.5      | 0.001   |
| BI (score)                 | 23.4±22.0  | 59.3±28.0      | <0.001  |
| %AC (%)                    | 98.8±14.2  | 101.5±14.1     | 0.346   |
| %TSF (%)                   | 95.4±58.4  | 105.9±49.8     | 0.329   |
| %AMA (%)                   | 102.4±22.1 | 107.5±27.4     | 0.328   |
| %AMC (%)                   | 100.4±10.8 | 102.8±12.6     | 0.318   |
| CONUT (score)              | 4.3±3.2    | 3.3±2.5        | 0.070   |

Values are means ± standard deviation.

\*Calculated only for those who performed MPT (n = 37 in the DG and n = 67 in the non-DG).

DG, Dysphagia Group; non-DG, non-Dysphagia Group; MMSE, Mini-Mental State Examination; MSAS, Modified Specific Activity Scale; MPT, Maximum Phonation Time; BI, Barthel Index; AC, Arm Circumference; TSF, Triceps Skin Fold; AMA, Arm Muscle Area; AMC, Arm Muscle Circumference; CONUT, Controlling Nutritional Status.

doi:10.1371/journal.pone.0167326.t004

**Table 5. Swallowing screening tests.**

|                            | DG(n = 38) | non-DG(n = 67) | P-value |
|----------------------------|------------|----------------|---------|
| Performed evaluation (day) | 3.1±2.1    | 2.9±1.6        | 0.622   |
| Drinking start (day)       | 1.2±0.4    | 1.3±0.9        | 0.530   |
| Diet start (day)           | 3.0±3.1    | 1.5±1.0        | <0.001  |
| RSST positive              | 25 (65.8)  | 10 (14.9)      | <0.001  |
| WST (score)                | 3.2±0.7    | 4.4±0.9        | <0.001  |

Values are means ± standard deviation or numbers of subjects per group (n) with percentages.

DG, Dysphagia Group; non-DG, non-Dysphagia Group; RSST, Repetitive Saliva Swallowing Test; WST, Water Swallowing Test.

doi:10.1371/journal.pone.0167326.t005

**Table 6. Predictors of dysphagia.**

|               | β     | SE    | Wald   | P-value | OR    | 95%CI       |
|---------------|-------|-------|--------|---------|-------|-------------|
| MMSE          | 0.144 | 0.063 | 5.200  | 0.023   | 1.155 | 1.020–1.306 |
| Transthyretin | 0.127 | 0.210 | 8.732  | 0.046   | 1.136 | 1.002–1.287 |
| BI            | 0.042 | 0.013 | 10.138 | 0.001   | 1.043 | 1.016–1.070 |

Analysis was performed adjusting for age and sex.

MMSE, Mini-Mental State Examination; BI, Barthel Index; SE, Standard Error; OR, Odds Ratio; CI, Confidence Interval.

doi:10.1371/journal.pone.0167326.t006



were hemoglobin and hematocrit; therefore, hemoglobin and hematocrit were excluded from the multivariate model, according to the bibliography [23]. Variables such as medical history of aspiration pneumonia and dementia, use of dentures, NT-proBNP, TLC, BUN, CRP, albumin, transthyretin, MMSE, handgrip strength, prehospital MSAS and MSAS, MPT, and prehospital BI and BI, were entered into a multivariate model. There were significance difference in the MMSE (OR = 1.155, 95% CI: 1.020–1.306,  $P = 0.023$ ), transthyretin (OR = 1.136, 95% CI: 1.002–1.287,  $P = 0.046$ ) and, BI (OR = 1.043, 95% CI: 1.016–1.070,  $P = 0.001$ ) after adjusting for age and sex.

## Discussion

This prospective study showed the comorbidity of dysphagia in patients with acute exacerbation of CHF. Dysphagia was observed in 36.1% of patients. Comorbidity of dysphagia was previously shown to be 50.4% with acute stroke [24], 81.1% with Parkinson's disease [25], and 20.5% in COPD of acute exacerbation [26], which frequently causes dysphagia. The incidence of comorbidity of dysphagia in patients with acute exacerbation of CHF was lower than acute stroke patients, however, higher than patients with acute exacerbation of COPD. Moreover, the incidence of comorbidity with dysphagia in patients with CHF in the present study is similar to comorbidity rates with metabolic syndrome and chronic kidney disease in patients with CHF (both approximately 40%) [27], but higher than other comorbidities in patients with CHF such as anemia (approximately 30%), stroke (approximately 20%), and cancer (approximately 10%) [27].

MMSE score was found to be an independent predictor of dysphagia in patients with acute exacerbation of CHF after adjusting for age and sex. Prevalence of swallowing difficulties in patients with dementia ranged from 13 to 57% in a previous meta-analysis [28]. In the previous study, the alzheimer disease (AD) patients were impaired in "oral transit delay" with liquids, whereas the vascular dementia (VaD) patients showed deficits in "bolus formation and mastication" of semisolid food, "hyolaryngeal excursion", "epiglottic inversion", and "silent aspiration" [29]. Moreover, "delayed swallowing reflex" was observed both of patients [29]. Thus, the previous study reported that the comorbidity of dysphagia is high in patients with dementia, and the swallowing disorders of the AD may result from sensory impairment in relation to dysfunctions in the temporoparietal areas, whereas the swallowing disorders of VaD may primarily be caused by motor impairments due to disruptions in the corticobulbar tract [29].

According to another meta-analysis, the prevalence of dementia in individuals aged over 60 was 5–7% [30]. However, cognitive dysfunction was observed in 52.6% of patients with CHF and cognitive function was associated with age and ejection fraction [31]. Chronic cerebral hypoperfusion [32] and acceleration of cerebral aging [33], caused by cardiac dysfunction [32], were factors involved in cognitive dysfunction in patients with CHF. Increased heart failure severity, longer disease duration, and increased B-type natriuretic peptide levels are associated with lower cerebral blood flow in patients with CHF [34]. Moreover, high levels of NT-proBNP are associated with increased risk of dementia in the elderly [35]. Thus, NT-proBNP, BNP, heart failure severity is risk factor of cognitive dysfunction in patients with CHF. Actually, in the present study, the DG had higher NT-proBNP levels and heart failure severity on admission compared with the non-DG. Therefore, NT-proBNP level and heart failure severity may be related to lower MMSE score in patients with dysphagia. All eight patients with a history of dementia were in the DG. However, 50% of patients had MMSE scores less than cut-off values (<24 points; 88.9% in the DG vs. 25.6% in the non-DG). Thus, the number of patients suspected of having cognitive dysfunction was higher in the DG compared with the non-DG, after adjusting for age and sex.

Moreover, transthyretin and BI were also independent predictor of dysphagia in patients with acute exacerbation of CHF. Albumin and transthyretin were significantly lower and CONUT tended to be higher in the DG, compared with the non-DG. These results show that the DG were malnutrition compared with the non-DG in admission. The DG might be malnutrition before admission, and it may have been caused by dysphagia and/or cardiac cachexia. Previous study reported that malnutrition impairs respiratory muscles [36] and skeletal muscles [37], and may cause swallowing muscle dysfunction [38, 39]. Additionally, it is shown that muscle weakness is an independent predictor of pharyngeal dysfunction [40]. In this study, the DG had significantly lower muscle strength and MWST score, and had significantly higher ratio of RSST positive, compared with the non-DG. This results suggested that the DG had pharyngeal dysfunction due to malnutrition and/or muscle strength. Furthermore, the DG had significantly lower BI and MSAS, and had significantly lower prehospital BI and MSAS, compared with the non-DG. These results suggest that patients with dysphagia had lower ADL and exercise tolerance before admission. Lower BI, malnutrition, and dysphagia were significantly associated with the incidence of aspiration pneumonia [41], and patients with lower ADL score had higher aspiration risk [42]. Therefore, it is necessary to be careful about drawing conclusions concerning the comorbidity of dysphagia in patients with CHF who had cognitive dysfunction, low levels of ADL, and malnutrition.

MPT was significantly lower in the DG compared with the non-DG. MPT is related to the severity of respiratory impairment [43]. Thus, lower MPT in patients with dysphagia may reflect respiratory muscle weakness due to malnutrition and/or generalized muscle weakness, and respiratory disorder due to acute exacerbation of CHF.

Additionally, patients who had a history of aspiration pneumonia were significantly higher in the DG; these patients may have had swallowing dysfunction before admission. Thus, it is important that comorbidity of dysphagia is investigated in patients with a medical history of aspiration pneumonia.

There are several limitations of the current study. First, the sample size was small. Second, videofluoroscopic or videoendoscopic swallowing examinations were not performed. Therefore, details concerning swallowing dysfunction remain unclear. Videofluoroscopic or videoendoscopic swallowing examinations are important for diagnosis of dysphagia. However, these examinations are invasive evaluation methods and cannot always be performed depending on conditions of patients, especially in acute-phase patients. In contrast, FOIS measured the level of independence of functional oral intake is a noninvasive evaluation method of dysphagia. Thus, FOIS is useful a useful method for evaluating dysphagia in acute-phase patients with CHF. Third, prognosis in patients with dysphagia and the effect of rehabilitation remain unclear. Further studies, such as a multicenter trial, longitudinal study, and intervention studies, are needed to clarify the relationship between dysphagia and CHF. Specifically, dysphagia caused by disuse syndrome due to heart failure severity and/or disease duration may respond to cardiac rehabilitation to improve dysphagia, as well as exercise tolerance and ADL.

## Conclusions

The present study revealed that comorbidity of dysphagia was high in patients with acute exacerbation of CHF. Additionally, MMSE, high levels of transthyretin, and BI were independent predictors of dysphagia. The results of the present study may aid early detection of patients with dysphagia, and may contribute to prevention of aspiration pneumonia, shortening length hospitalization, and improvement of prognosis in patients with acute exacerbation of CHF.

## Acknowledgments

The authors gratefully acknowledge the participation of all study patients and thank all colleagues in our department for their contribution to the medical care of the patients.

## Author Contributions

**Conceptualization:** YJ.

**Data curation:** JY.

**Formal analysis:** JY.

**Investigation:** JY SY YT HF NY NO TI TS.

**Methodology:** JY YO.

**Project administration:** MK.

**Software:** MK.

**Supervision:** MK.

**Validation:** JY YO MK.

**Writing – original draft:** JY.

**Writing – review & editing:** YO MK.

## References

1. Mozaffarian D, Benjamin EJ, Go AS, Arnett DK, Blaha MJ, Cushman M, et al. Heart disease and stroke statistics—2015 update: a report from the American Heart Association. *Circulation* 2014; 129: e29–322, accessed March 9, 2016. doi: [10.1161/CIR.000000000000152](https://doi.org/10.1161/CIR.000000000000152) PMID: [25520374](https://pubmed.ncbi.nlm.nih.gov/25520374/)
2. Okura Y, Ramadan MM, Ohno Y, Mitsuma W, Tanaka K, Ito M, et al. Impending epidemic: future projection of heart failure in Japan to the year 2055. *Circ J* 2008; 72: 489–491. PMID: [18296852](https://pubmed.ncbi.nlm.nih.gov/18296852/)
3. Bassi D, Furkim AM, Silva CA, Coelho MS, Rolim MR, Alencar ML, et al. Identification of risk groups for oropharyngeal dysphagia in hospitalized patients in a university hospital. *Codas* 2014; 26: 17–27. PMID: [24714855](https://pubmed.ncbi.nlm.nih.gov/24714855/)
4. Altman KW, Yu GP, Schaefer SD. Consequence of dysphagia in the hospitalized patient: impact on prognosis and hospital resources. *Arch Otolaryngol Head Neck Surg* 2010; 136: 784–789. doi: [10.1001/archoto.2010.129](https://doi.org/10.1001/archoto.2010.129) PMID: [20713754](https://pubmed.ncbi.nlm.nih.gov/20713754/)
5. Zhu J, Zhang X, Shi G, Yi K, Tan X. Atrial Fibrillation Is an Independent Risk Factor for Hospital-Acquired Pneumonia. *PLoS One* 2015; 10: e0131782, eCollection 2015. accessed March 9, 2016. doi: [10.1371/journal.pone.0131782](https://doi.org/10.1371/journal.pone.0131782) PMID: [26204447](https://pubmed.ncbi.nlm.nih.gov/26204447/)
6. Serra-Prat M, Palomera M, Gomez C, Sar-Shalom D, Saiz A, Montoya JG, et al. Oropharyngeal dysphagia as a risk factor for malnutrition and lower respiratory tract infection in independently living older persons: a population-based prospective study. *Age Ageing* 2012; 41: 376–381. PMID: [22311895](https://pubmed.ncbi.nlm.nih.gov/22311895/)
7. Maeda K, Akagi J. Decreased tongue pressure is associated with sarcopenia and sarcopenic dysphagia in the elderly. *Dysphagia* 2015; 30: 80–87. doi: [10.1007/s00455-014-9577-y](https://doi.org/10.1007/s00455-014-9577-y) PMID: [25248988](https://pubmed.ncbi.nlm.nih.gov/25248988/)
8. Anker SD, Laviano A, Filippatos G, John M, Paccagnella A, Ponikowski P, et al. ESPEN Guidelines on Parenteral Nutrition: on cardiology and pneumology. *Clin Nutr* 2009; 28: 455–460. doi: [10.1016/j.clnu.2009.04.023](https://doi.org/10.1016/j.clnu.2009.04.023) PMID: [19515464](https://pubmed.ncbi.nlm.nih.gov/19515464/)
9. Crary MA, Mann GD, Groher ME. Initial psychometric assessment of a functional oral intake scale for dysphagia in stroke patients. *Arch Phys Med Rehabil* 2005; 86: 1516–1520. doi: [10.1016/j.apmr.2004.11.049](https://doi.org/10.1016/j.apmr.2004.11.049) PMID: [16084801](https://pubmed.ncbi.nlm.nih.gov/16084801/)
10. Kim Y, Park GY, Seo YJ, Im S. Effect of anterior cervical osteophyte in poststroke dysphagia: a case-control study. *Arch Phys Med Rehabil* 2015; 96: 1269–1276. doi: [10.1016/j.apmr.2015.02.026](https://doi.org/10.1016/j.apmr.2015.02.026) PMID: [25769673](https://pubmed.ncbi.nlm.nih.gov/25769673/)
11. Folstein MF, Folstein SE, McHigh PR. “Mini-mental state”: a practical method of grading the cognitive function of patients for the clinician. *J Psychiatr Res* 1978; 12: 189–198.

12. Izawa K, Hirano Y, Yamada S, Oka K, Omiya K, Iijima S. Improvement in Physiological Outcomes and Health-Related Quality of Life Following Cardiac Rehabilitation in Patients With Acute Myocardial Infarction. *Cir J* 2004; 68: 315–320.
13. Adachi Y, Konishi H, Fukui T, Noguchi T, Kawakami R, Nakanishi M, et al. An Examination of Validity of modified Specific Activity Scale. *JJCR* 2009; 14: 115–118. (in Japanese)
14. Goldman L, Hashimoto B, Cook EF, Loscalzo A. Comparative reproducibility and validity of systems for assessing cardiovascular functional class: advantages of a new specific activity scale. *Circulation* 1981; 64: 1227–1234. PMID: [7296795](#)
15. Speyer R, Bogaardt HC, Passos VL, Roodenburg NP, Zumach A, Heijnen MA, et al. Maximum phonation time: variability and reliability. *J Voice* 2010; 24: 281–284. doi: [10.1016/j.jvoice.2008.10.004](#) PMID: [19111437](#)
16. Mahoney FI, Barthel DW. Functional Evaluation: The Barthel Index. *Maryland State Med J* 1965; 14: 61–65.
17. Hosoya N, Okada T, Muto Y, Yamamori H, Tashiro T, Miwa Y, et al. Japanese anthropometric reference data 2001 (JARD 2001). *Japanese Journal of Nutritional Assessment. Med Rev* 2002; 19 (Suppl): 1–81. (in Japanese)
18. Ignacio de Ulíbarri J, González-Madroño A, de Villar NG, González P, González B, Mancha A, et al. CONUT: a tool for controlling nutritional status. First validation in a hospital population. *Nutr Hosp* 2005; 20: 38–45.
19. Wakahara T, Shiraki M, Murase K, Fukushima H, Matsuura K, Fukao A, et al. Nutritional screening with Subjective Global Assessment predicts hospital stay in patients with digestive diseases. *Nutrition* 2007; 23: 634–639. doi: [10.1016/j.nut.2007.06.005](#) PMID: [17629455](#)
20. Oguchi K, Saitoh E, Mizuno M, Baba M, Okui M, Suzuki M. The repetitive saliva swallowing test (RSST) as a screening test of functional dysphagia (1) Normal values of RSST. *Jpn J Rehabil Med* 2000; 37: 375–382. (in Japanese)
21. Oguchi K, Saitoh E, Baba M, Kusudo S, Tanaka T, Onogi K. The repetitive saliva swallowing test (RSST) as a screening test of functional dysphagia (2) Validity of RSST. *Jpn J Rehabil Med* 2000; 37: 383–388. (in Japanese)
22. Tohara H, Saitoh E, Mays KA, Kuhlemeier K, Palmer JB. Three tests for predicting aspiration without videofluorography. *Dysphagia* 2003; 18: 126–134. doi: [10.1007/s00455-002-0095-y](#) PMID: [12825906](#)
23. Glantz SA, Slinker BK. Multicollinearity and What to Do About It. In: Glantz SA, Slinker BK, editors. *Primer of Applied Regression and Analysis of Variance*. 2nd ed. New York: McGraw-Hill Education; 2001. Pp. 185–240.
24. Smithard DG, O'Neill PA, England RE, Park CL, Wyatt R, Martin DF, et al. The natural history of dysphagia following a stroke. *Dysphagia* 1997; 12: 188–193.
25. Coates C, Bakheit AM. Dysphagia in Parkinson's disease. *Eur Neurol* 1997; 38: 49–52. PMID: [9252799](#)
26. Good-Fratturelli MD, Curlee RF, Holle JL. Prevalence and nature of dysphagia in VA patients with COPD referred for videofluoroscopic swallow examination. *J Commun Disord* 2000; 33: 93–110. PMID: [10834828](#)
27. Shiba N, Nochioka K, Miura M, Kohno H, Shimokawa H; on behalf of the CHART-2 Investigators. Trend of westernization of etiology and clinical characteristics of heart failure patients in Japan: First report from the CHART-2 Study. *Circ J* 2011; 75: 823–833. PMID: [21436596](#)
28. Alagiakrishnan K, Bhanji RA, Kurian M. Evaluation and management of oropharyngeal dysphagia in different types of dementia: a systematic review. *Arch Gerontol Geriatr* 2013; 56: 1–9. doi: [10.1016/j.archger.2012.04.011](#) PMID: [22608838](#)
29. Suh MK, Kim H, Na DL. Dysphagia in patients with dementia: Alzheimer versus vascular. *Alzheimer Dis Assoc Disord* 2009; 23: 178–184. doi: [10.1097/WAD.0b013e318192a539](#) PMID: [19474573](#)
30. Prince M, Bryce R, Albanese E, Wimo A, Ribeiro W, Ferri CP. The global prevalence of dementia: a systematic review and metaanalysis. *Alzheimers Dement* 2013; 9: 63–75. doi: [10.1016/j.jalz.2012.11.007](#) PMID: [23305823](#)
31. Zuccalà G, Cattel C, Manes-Gravina E, Di Niro MG, Cocchi A, Bernabei R. Left ventricular dysfunction: a clue to cognitive impairment in older patients with heart failure. *J Neurol Neurosurg Psychiatry* 1997; 63: 509–512. PMID: [9343133](#)
32. Gruhn N, Larsen FS, Boesgaard S, Knudsen GM, Mortensen SA, Thomsen G, et al. Cerebral blood flow in patients with chronic heart failure before and after heart transplantation. *Stroke* 2001; 32: 2530–2533. PMID: [11692012](#)

33. Oh JE, Shin JW, Sohn EH, Jung JO, Jeong SH, Song HJ, et al. Effect of cardiac function on cognition and brain structural changes in dementia. *J Clin Neurol* 2012; 8: 123–129. doi: [10.3988/jcn.2012.8.2.123](https://doi.org/10.3988/jcn.2012.8.2.123) PMID: [22787496](https://pubmed.ncbi.nlm.nih.gov/22787496/)
34. Choi BR, Kim JS, Yang YJ, Park KM, Lee CW, Kim YH, et al. Factors associated with decreased cerebral blood flow in congestive heart failure secondary to idiopathic dilated cardiomyopathy. *Am J Cardiol* 2006; 97: 1365–1369. doi: [10.1016/j.amjcard.2005.11.059](https://doi.org/10.1016/j.amjcard.2005.11.059) PMID: [16635612](https://pubmed.ncbi.nlm.nih.gov/16635612/)
35. Mirza SS, de Bruijn RF, Koudstaal PJ, van den Meiracker AH, Franco OH, Hofman A, et al. The N-terminal pro B-type natriuretic peptide, and risk of dementia and cognitive decline: a 10-year follow-up study in the general population. *J Neurol Neurosurg Psychiatry* 2015; 27. accessed March 9, 2016.
36. Arora NS, Rochester DF. Respiratory muscle strength and maximal voluntary ventilation in undernourished patients. *Am Rev Respir Dis* 1982; 126: 5–8. PMID: [7091909](https://pubmed.ncbi.nlm.nih.gov/7091909/)
37. Shizgal HM, Vasilevsky CA, Gardiner PF, Wang WZ, Tuit DA, Brabant GV. Nutritional assessment and skeletal muscle function. *Am J Clin Nutr* 1986; 44: 761–771. PMID: [3098084](https://pubmed.ncbi.nlm.nih.gov/3098084/)
38. Veldee MS, Peth LD. Can protein-calorie malnutrition cause dysphagia? *Dysphagia* 1992; 7: 86–101. PMID: [1572231](https://pubmed.ncbi.nlm.nih.gov/1572231/)
39. Hudson HM, Daubert CR, Mills RH. The interdependency of protein-energy malnutrition, aging, and dysphagia. *Dysphagia* 2000; 15: 31–38. doi: [10.1007/s004559910007](https://doi.org/10.1007/s004559910007) PMID: [10594256](https://pubmed.ncbi.nlm.nih.gov/10594256/)
40. Mirzakhani H, Williams JN, Mello J, Joseph S, Meyer MJ, et al. Muscle weakness predicts pharyngeal dysfunction and symptomatic aspiration in long-term ventilated patients. *Anesthesiology* 2013; 119: 389–397. doi: [10.1097/ALN.0b013e31829373fe](https://doi.org/10.1097/ALN.0b013e31829373fe) PMID: [23584384](https://pubmed.ncbi.nlm.nih.gov/23584384/)
41. Wójkowska-Mach J, Gryglewska B, Romaniszyn D, Natkaniec J, Pobjega M, Adamski P, et al. Age and other risk factors of pneumonia among residents of Polish long-term care facilities. *Int J Infect Dis* 2013; 17: e37–43, accessed March 9, 2016.
42. Katsura H, Yamada K, Kida K. Outcome of repeated pulmonary aspiration in frail elderly. The Project Team for Aspiration Pneumonia. *Nihon Ronen Igakkai Zasshi* 1998; 35: 363–366. (in Japanese) PMID: [9711090](https://pubmed.ncbi.nlm.nih.gov/9711090/)
43. Hillel AD, Yorkston K, Miller RM. Using phonation time to estimate vital capacity in amyotrophic lateral sclerosis. *Arch Phys Med Rehabil* 1989; 70: 618–620. PMID: [2764692](https://pubmed.ncbi.nlm.nih.gov/2764692/)
